# Supplementary material for: Maternal and Perinatal Risk Factors for Infantile Hemangioma: A Matched Case-Control Study with a Large Sample Size
Source: Springer Nature journal article supplement (doi:10.1007/s13555-022-00756-4), 2022-06-25
Supplement: MOESM1 [file 23205692]

---

## Title

Maternal and Perinatal Risk Factors for Infantile Hemangioma: a Matched Case-Control Study With a Large Sample Size

Xue Gong<sup>1†</sup>, MD, Tong Qiu<sup>1†</sup>, MD, Liwei Feng<sup>1†</sup>, BSN, Kaiying Yang<sup>1</sup>, MD, Shiyi Dai<sup>1</sup>, MD, Jiangyuan Zhou<sup>1</sup>, MD, Xuepeng Zhang<sup>1</sup>, MD, Siyuan Chen<sup>2</sup>, MD, PhD, Yi Ji<sup>1\*</sup>, MD, PhD

<sup>1</sup>Division of Oncology, Department of Pediatric Surgery, West China Hospital of Sichuan University, Chengdu, 610041, China

<sup>2</sup>Pediatric Intensive Care Unit, Department of Critical Care Medicine, West China Hospital of Sichuan University, Chengdu, 610041, China

†: These authors contributed equally to this work and shared first authorship.

\* **Address correspondence to:** Yi Ji, MD, PhD, Division of Oncology, Department of Pediatric Surgery. West China Hospital of Sichuan University. #37# Guo-Xue-Xiang, Chengdu, 610041, China. Tel: +86 18980606865; Fax: +86 28 85423453; Email: [jjiyuanyuan@163.com](mailto:jjiyuanyuan@163.com).

---

**Supplementary Table S1: Part of the Clinical Characteristics of the IH Cases**

---

| Characteristics       | n (%)       |
|-----------------------|-------------|
| Female to male ratio  | 2.17:1      |
| Localization          |             |
| Trunk                 | 362(35.04%) |
| Face                  | 280(27.11%) |
| Extremities           | 263(25.46%) |
| Head and neck         | 175(16.94%) |
| Perineum              | 51(4.94%)   |
| Description           |             |
| Superficial           | 738(71.44%) |
| Fixed                 | 220(21.30%) |
| Deep                  | 46(4.45%)   |
| Morphological subtype |             |
| Focal                 | 857(82.96%) |
| Multifocal            | 61(5.91%)   |
| Indeterminate         | 64(6.20%)   |
| Segmental             | 59(5.71%)   |
| Complications         |             |
| Disfigurement         | 235(22.75%) |
| Ulceration            | 41(3.97%)   |
| Visual impairment     | 8(0.77%)    |
| Heart failure         | 3(0.29%)    |

---
